# Supplementary material for: RANKL Inhibition Reduces Cardiac Hypertrophy in mdx Mice and Possibly in Children with Duchenne Muscular Dystrophy
Source: MDPI journal article supplement (doi:10.3390/cells12111538), 2023-06-03
Supplement: s1 [file s1]

## SUPPLEMENTAL MATERIAL

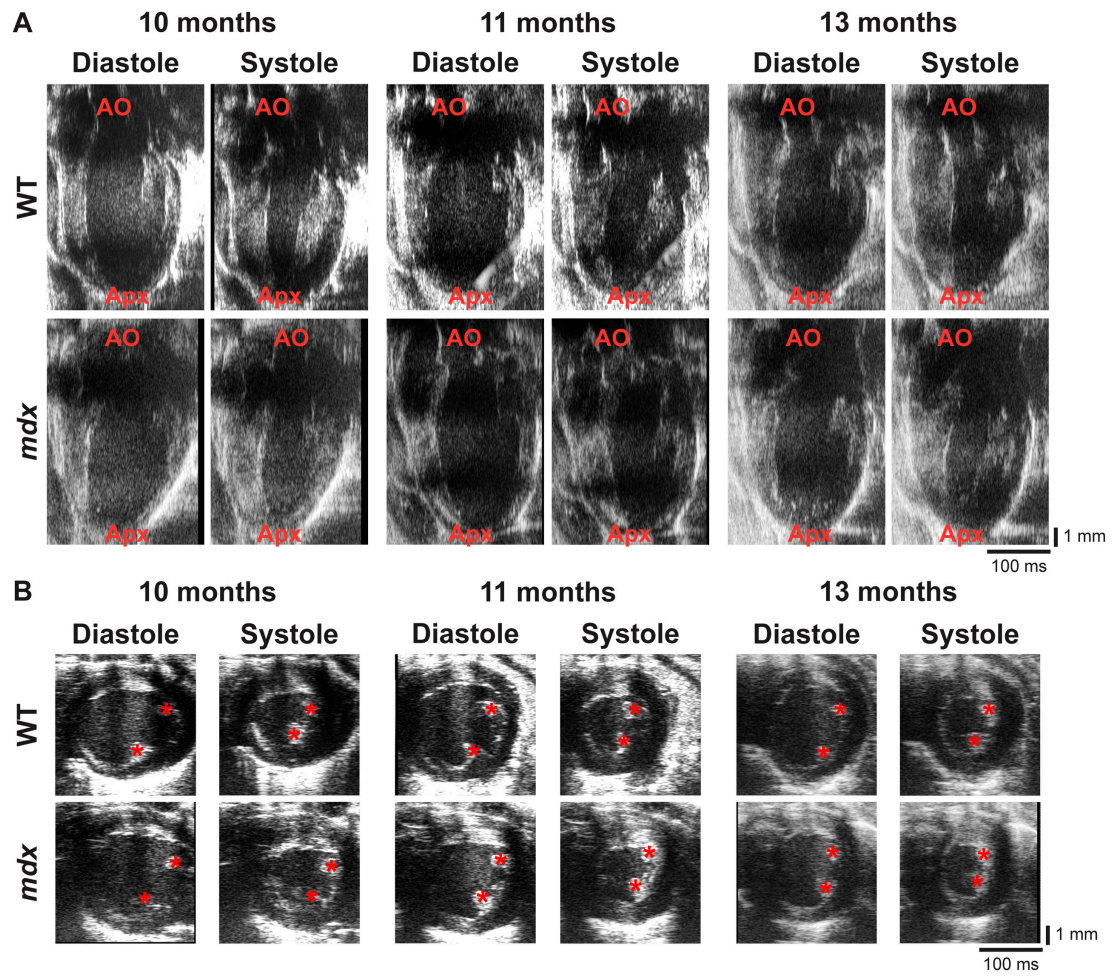

**Supplemental Figure S1.** Representative echocardiography B-mode images of hearts from WT and *mdx* heart mice at 10, 11, and 13 months of age. Para-sternal long-axis (A) and short-axis (B) of the left ventricle. Vertical and horizontal scale bars represent the size in mm and the time in ms, respectively. AO, aorta; Apx, apex (A). The red asterisks indicate papillary muscles (B).

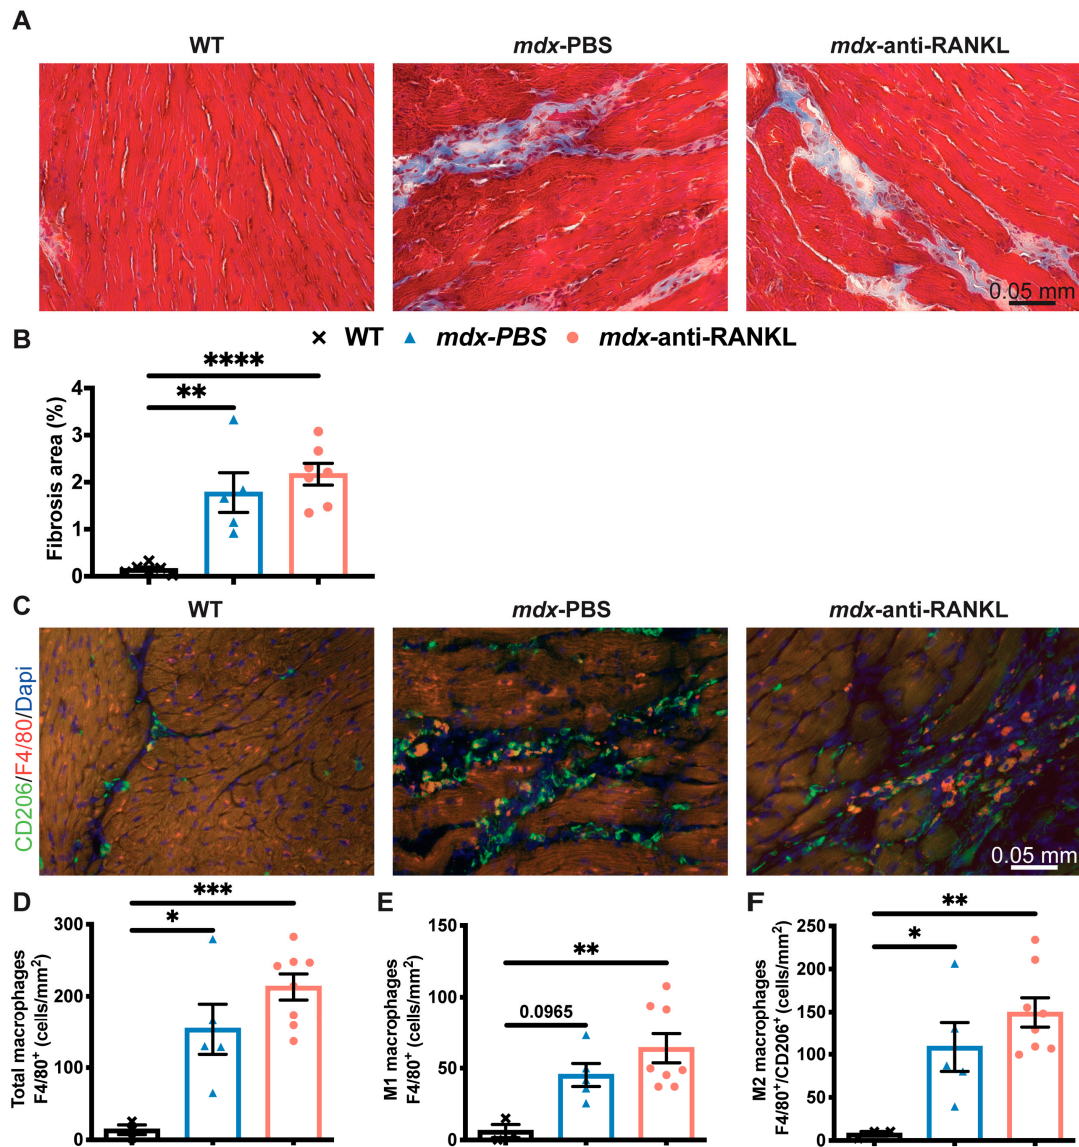

**Supplemental Figure S2.** Representative Masson's trichrome staining of cardiac tissue (A). Fibrosis area quantification (B). We examined inflammation by labelling heart sections with F4/80 (red), a marker for all macrophage phenotypes, and CD206 (green), an M2-macrophage specific antibody, and DAPI (blue) for nuclei (C). Count of the total number of macrophages (D), M1-macrophages (E) and M2-macrophages (F). Data are presented as means  $\pm$  SEM. \* $p < 0.05$ , \*\* $p < 0.01$  and \*\*\* $p < 0.001$ , \*\*\*\* $p < 0.0001$ , determined by unpaired two-tailed Student's t-test. The scale bar in A and C represents 0.05 mm.  $n = 6$  for WT,  $n = 5$  for *mdx* PBS and  $n = 7$  for *mdx* anti-RANKL for fibrosis (A, B) and  $n = 3$  for WT,  $n = 5$  for *mdx* PBS and  $n = 8$  for *mdx* anti-RANKL for macrophages (C-F).

**Table S1. Cardiac parameters measured by echocardiography in WT and *mdx* mice at 10, 11 and 13 months of age**

| Age                     | 10 months   |                   | 11 months   |                   | 13 months        |                   |
|-------------------------|-------------|-------------------|-------------|-------------------|------------------|-------------------|
| Mouse strain            | WT (n=9)    | <i>mdx</i> (n=13) | WT (n=11)   | <i>mdx</i> (n=11) | WT (n=11)        | <i>mdx</i> (n=12) |
| LVAW;d (mm)             | 0.81 ± 0.04 | 1.13 ± 0.05 ***   | 1.07 ± 0.08 | 1.26 ± 0.07       | 1.33 ± 0.07 †††† | 1.44 ± 0.06 †††   |
| LVAW;s (mm)             | 1.41 ± 0.08 | 1.66 ± 0.07 *     | 1.66 ± 0.09 | 1.74 ± 0.09       | 1.81 ± 0.08 ††   | 1.81 ± 0.06       |
| LVPW;d (mm)             | 0.73 ± 0.05 | 0.84 ± 0.04       | 0.87 ± 0.04 | 0.94 ± 0.06       | 0.97 ± 0.07 †    | 1.04 ± 0.06 †     |
| LVPW;s (mm)             | 1.16 ± 0.09 | 1.27 ± 0.04       | 1.46 ± 0.06 | 1.34 ± 0.08       | 1.40 ± 0.09      | 1.42 ± 0.08       |
| LVID;d (mm)             | 4.22 ± 0.04 | 3.69 ± 0.1 ***    | 3.78 ± 0.1  | 3.69 ± 0.1        | 3.51 ± 0.2 ††    | 3.67 ± 0.09       |
| LVID;s (mm)             | 2.72 ± 0.1  | 2.31 ± 0.1 *      | 2.19 ± 0.2  | 2.44 ± 0.2        | 2.20 ± 0.2       | 2.68 ± 0.1        |
| Volume;d (μL)           | 79.8 ± 1.88 | 58.7 ± 3.62 ***   | 62.6 ± 5.43 | 59.9 ± 6.60       | 53.7 ± 6.72 ††   | 57.6 ± 3.24       |
| Volume;s (μL)           | 28.3 ± 3.01 | 19.1 ± 1.90 *     | 18 ± 3.35   | 23.5 ± 4.41       | 20.5 ± 4.49      | 27.7 ± 3.13       |
| Stroke Volume (μL)      | 51.5 ± 2.48 | 39.7 ± 2.05 **    | 44.7 ± 2.54 | 36.3 ± 2.76 *     | 33.2 ± 2.83 †††† | 29.9 ± 1.33 ††    |
| EF (%)                  | 64.8 ± 3.46 | 68.2 ± 1.59       | 73.5 ± 2.97 | 63.8 ± 3.78       | 66.5 ± 4.30      | 53.3 ± 3.34 * ††  |
| FS (%)                  | 35.8 ± 2.65 | 37.6 ± 1.24       | 42.9 ± 2.73 | 34.9 ± 2.92       | 37.1 ± 3.27      | 27.4 ± 2.30 * †   |
| Heart Rate (bpm)        | 459 ± 45    | 448 ± 16.5        | 507 ± 17.2  | 479 ± 26.7        | 481 ± 16.5       | 480 ± 12.6        |
| Cardiac Output (mL/min) | 24.0 ± 2.82 | 17.7 ± 1.12 *     | 22.3 ± 0.9  | 16.9 ± 1 ***      | 15.8 ± 1.2 ††    | 14.3 ± 0.7        |
| LV mass (mg)            | 99.2 ± 6.93 | 112 ± 6.63        | 113 ± 4.51  | 128 ± 4.84        | 128 ± 5.16 †     | 155 ± 5.82 ††††   |

LVAW : Left ventricular anterior wall thickness end diastole (d) and end systole (s). LVPW : Left ventricular posterior wall thickness end diastole (d) and end systole (s). LVID : Left ventricular internal diameter end diastole (d) and end systole (s). EF : Ejection fraction. FS : Fractional shortening. Data are expressed as means ± SEM. P values for significant differences between WT and *mdx* values at a given age are represented by: \*p<0.05, \*\*p<0.01, \*\*\*p<0.001, or \*\*\*\*p<0.0001. P values for significant differences between 10 and 13 months within strain WT or *mdx* are represented by: †p<0.05, ††p<0.01, †††p<0.001, or ††††p<0.0001.

**Table S2. Cardiac parameters measured by echocardiography in *mdx* mice before and after treatment, at 11 and 13 months of age, respectively**

| Mouse strain and treatment | <i>mdx</i> -PBS (n=19) |                   | <i>mdx</i> -anti-RANKL (n=16) |                     |
|----------------------------|------------------------|-------------------|-------------------------------|---------------------|
| Age (month)                | 11 pre-treatment       | 13 post-treatment | 11 pre-treatment              | 13 post-treatment   |
| LVAW;d (mm)                | 1.19 ± 0.05            | 1.36 ± 0.05 *     | 1.25 ± 0.04                   | 1.10 ± 0.04 * †††   |
| LVAW;s (mm)                | 1.70 ± 0.08            | 1.75 ± 0.06       | 3.67 ± 0.1                    | 3.43 ± 0.09         |
| LVPW;d (mm)                | 0.966 ± 0.04           | 1.03 ± 0.04       | 0.989 ± 0.05                  | 0.932 ± 0.03        |
| LVPW;s (mm)                | 1.37 ± 0.06            | 1.39 ± 0.06       | 1.34 ± 0.08                   | 1.32 ± 0.05         |
| LVID;d (mm)                | 3.59 ± 0.1             | 3.56 ± 0.09       | 3.67 ± 0.1                    | 3.43 ± 0.09         |
| LVID;s (mm)                | 2.33 ± 0.2             | 2.54 ± 0.1        | 2.51 ± 0.2                    | 2.21 ± 0.1          |
| Volume;d (μL)              | 56.6 ± 5.29            | 54 ± 3.30         | 59 ± 4.24                     | 49.3 ± 3.27         |
| Volume;s (μL)              | 22.3 ± 3.79            | 24.8 ± 2.58       | 25.4 ± 3.19                   | 18.2 ± 2.71         |
| Stroke Volume (μL)         | 34.3 ± 2.16            | 29.2 ± 1.36       | 33.6 ± 2.01                   | 31.1 ± 2.01         |
| EF (%)                     | 65.4 ± 3.54            | 56 ± 2.43 *       | 60.4 ± 3.80                   | 64.9 ± 3.81 †       |
| FS (%)                     | 36.6 ± 2.73            | 29 ± 1.62 *       | 33.1 ± 3.20                   | 36 ± 2.89 †         |
| Heart Rate (bpm)           | 483 ± 22.9             | 479 ± 11.5        | 451 ± 16.3                    | 498 ± 14 *          |
| Cardiac Output (mL/min)    | 16.1 ± 0.9             | 13.9 ± 0.6        | 15 ± 1                        | 15.4 ± 0.9          |
| LV mass (mg)               | 121 ± 6.23             | 140 ± 5.98 *      | 132 ± 5.56                    | 104 ± 4.61 *** †††† |

LVAW : Left ventricular anterior wall thickness end diastole (d) and end systole (s). LVPW : Left ventricular posterior wall thickness end diastole (d) and end systole (s). LVID : Left ventricular internal diameter end diastole (d) and end systole (s). EF : Ejection fraction. FS : Fractional shortening. Data are expressed as means ± SEM. P values for significant changes overtime within treatment groups are represented by: \*p<0.05, \*\*p<0.01, \*\*\*p<0.001, or \*\*\*\*p<0.0001. P values for significant differences between treatment groups are represented by: †p<0.05, ††p<0.01, †††p<0.001, or ††††p<0.0001.
